# Supplementary material
Source: PubMed Central journal article supplement (PMC7218687)
Supplement: NIHMS1585658-supplement-1.pdf [file NIHMS1585658-supplement-1.pdf]

Table S1. Baseline Demographics and Clinical Characteristics by study inclusion status.

| Characteristic                 | Study Inclusion Status |                          |
|--------------------------------|------------------------|--------------------------|
|                                | Included<br>(n=432)    | Not Included<br>(n=1009) |
| Age (years)                    | 27.0 (7.4)             | 26.7 (7.0)               |
| Diabetes Duration (years)      | 6.1 (4.3)              | 5.7 (4.1)                |
| Female %(n)                    | 51.4 (222)             | 45.4 (458)*              |
| Intensive Trt assignment %(n)  | 50.2 (217)             | 49.0 (494)               |
| Primary Prevention Cohort %(n) | 48.6 (210)             | 51.1 (516)               |
| HbA1c %                        | 9.0 (1.6)              | 8.8 (1.6)*               |
| AER                            | 15.7 (19.0)            | 16.0 (18.7)              |
| eGFR                           | 126 (14)               | 126 (14)                 |
| Total Cholesterol              | 181 (34)               | 175 (33)*                |
| LDL Cholesterol                | 113 (29)               | 108 (29)*                |
| HDL Cholesterol                | 51 (13)                | 50 (12)                  |
| Triglycerides                  | 85 (50)                | 80 (47)*                 |
| Systolic Blood Pressure        | 113 (11)               | 115 (11)                 |
| Diastolic Blood Pressure       | 71 (9)                 | 73 (9)*                  |

Continuous data shown as unadjusted mean (standard deviation) and categorical data shown as % (n). \* P<0.05 as compared to included participants (From Kruskal-Wallis test statistic).
